# Supplementary material for: Pooling breast cancer datasets has a synergetic effect on classification performance and improves signature stability
Source: Springer Nature journal article supplement (doi:10.1186/1471-2164-9-375), 2008-01-01
Supplement: Additional file 14 [file 1471-2164-9-375-s14.pdf]

# Pooling breast cancer datasets has a synergetic effect on classification performance and improves signature stability

## Additional file 14

M.H. van Vliet<sup>\*1,2</sup>, F. Reyal<sup>3,5</sup>, H.M. Horlings<sup>3</sup>, M.J. van de Vijver<sup>3,4</sup>, M.J.T. Reinders<sup>1</sup>, L.F.A. Wessels<sup>1,2</sup>

<sup>1</sup>Information and Communication Theory Group, Faculty of Electrical Engineering, Mathematics and Computer Science, Delft University of Technology, Mekelweg 4, 2628 CD Delft, The Netherlands

<sup>2</sup>Bioinformatics and Statistics group, Department of Molecular Biology, Netherlands Cancer Institute, Plesmanlaan 121, 1066 CX Amsterdam, The Netherlands

<sup>3</sup>Department of Pathology, Netherlands Cancer Institute, Plesmanlaan 121, 1066 CX Amsterdam, The Netherlands

<sup>4</sup>Department of Pathology, Academic Medical Center, Meibergdreef 9, 1100 DD, Amsterdam, The Netherlands

<sup>5</sup>Department of Surgery, Institut Curie, 6 rue d'Ulm, 75005 Paris, France

Email: M.H. van Vliet\* - M.H.vanVliet@TUDelft.nl;

\*Corresponding author

| Dataset                       | Desmedt |     | Minn |     | Miller |    | Pawitan |     | Loi  |    | Chin |    |
|-------------------------------|---------|-----|------|-----|--------|----|---------|-----|------|----|------|----|
|                               | #       | %   | #    | %   | #      | %  | #       | %   | #    | %  | #    | %  |
| Number of Samples             | 147     |     | 96   |     | 247    |    | 156     |     | 178  |    | 123  |    |
| Number of Poor                | 29      | 20  | 21   | 22  | 37     | 15 | 22      | 14  | 28   | 16 | 23   | 19 |
| Number of Goor                | 91      | 62  | 41   | 43  | 156    | 63 | 120     | 77  | 92   | 52 | 63   | 51 |
| ER Status (IHC) Positive      | 96      | 65  | 54   | 56  | 209    | 85 | 0       | 0   | 142  | 80 | 80   | 65 |
| ER Status (IHC) Negative      | 51      | 35  | 42   | 44  | 34     | 14 | 0       | 0   | 30   | 17 | 43   | 35 |
| ER Status (IHC) NA            | 0       | 0   | 0    | 0   | 4      | 2  | 156     | 100 | 6    | 3  | 0    | 0  |
| ER Status (205225_at) Pos     | 101     | 69  | 63   | 66  | 184    | 74 | 124     | 79  | 139  | 78 | 87   | 71 |
| ER Status (205225_at) Neg     | 46      | 31  | 33   | 34  | 63     | 26 | 32      | 21  | 39   | 22 | 36   | 29 |
| HER2 Status (216836_s_at) Pos | 20      | 14  | 13   | 14  | 33     | 13 | 18      | 12  | 18   | 10 | 17   | 14 |
| HER2 Status (216836_s_at) Neg | 127     | 86  | 83   | 86  | 214    | 87 | 138     | 88  | 160  | 90 | 106  | 86 |
| Mean Tumor Size (mm)          | 23,3    |     | 36,4 |     | 22,5   |    |         |     | 23,9 |    | 26,5 |    |
| Tumor Size NA                 | 0       | 0   | 0    | 0   | 0      | 0  | 156     | 100 | 4    | 2  | 2    | 2  |
| Grade 1                       | 24      | 16  | 0    | 0   | 65     | 26 | 28      | 18  | 27   | 15 | 14   | 11 |
| Grade 2                       | 58      | 39  | 0    | 0   | 126    | 51 | 57      | 37  | 74   | 42 | 43   | 35 |
| Grade 3                       | 65      | 44  | 0    | 0   | 54     | 22 | 60      | 38  | 36   | 20 | 62   | 50 |
| Grade NA                      | 0       | 0   | 96   | 100 | 2      | 1  | 11      | 7   | 41   | 23 | 4    | 3  |
| Lymph Node Positive           | 0       | 0   | 62   | 65  | 82     | 33 | 0       | 0   | 37   | 21 | 68   | 55 |
| Lymph Node Negative           | 147     | 100 | 34   | 35  | 156    | 63 | 0       | 0   | 135  | 76 | 55   | 45 |
| Lymph Node NA                 | 0       | 0   | 0    | 0   | 9      | 4  | 156     | 100 | 6    | 3  | 0    | 0  |
